# Psychotic symptoms in 16p11.2 copy number variant carriers

Amandeep Jutla<sup>1,2</sup>, J. Blake Turner<sup>1,2</sup>, LeeAnne Green Snyder<sup>3</sup>,  
Wendy K. Chung<sup>4</sup>, and Jeremy Veenstra-VanderWeele<sup>1,2,5</sup>

<sup>1</sup>Department of Psychiatry, Columbia University

<sup>2</sup>New York State Psychiatric Institute

<sup>3</sup>Simons Foundation

<sup>4</sup>Departments of Pediatrics and Medicine, Columbia University

<sup>5</sup>Center for Autism and the Developing Brain, New York-Presbyterian Hospital

September 5, 2019

**Abstract:** 16p11.2 copy number variation (CNV) is implicated in neurodevelopmental disorders, with the duplication and deletion associated with autism spectrum disorder (ASD) and the duplication associated with schizophrenia (SCZ). The 16p11.2 CNV may therefore provide insight into the relationship between ASD and SCZ, distinct disorders that co-occur at an elevated rate and are difficult to distinguish from each other and from common co-occurring diagnoses such as obsessive compulsive disorder (OCD), itself a potential risk factor for SCZ. As psychotic symptoms are core to SCZ but distinct from ASD, we sought to examine their predictors in a population (n = 546) of 16p11.2 CNV carriers and their noncarrier siblings recruited by the Simons Variation in Individuals Project. We hypothesized that psychotic symptoms would be most common in duplication carriers followed by deletion carriers and noncarriers, that an ASD diagnosis would predict psychotic symptoms among CNV carriers, and that OCD symptoms would predict psychotic symptoms among all participants. Using data collected across multiple measures, we identified 19 participants with psychotic symptoms. Logistic regression models adjusting for biological sex, age, and IQ found that 16p11.2 duplication and ASD diagnosis predicted psychotic symptom presence. Our findings suggest that the association between 16p11.2 duplication and psychotic symptoms is independent of ASD diagnosis and that ASD diagnosis and psychotic symptoms may be associated in 16p11.2 CNV carriers.

**Lay Summary:** Either deletion or duplication at chromosome 16p11.2 raises the risk of autism spectrum disorder, and duplication, but not deletion, has been reported in schizophrenia. In a sample of 16p11.2 deletion and duplication carriers, we found that having the duplication or having an autism diagnosis may increase the risk of psychosis, a key feature of schizophrenia.

**Keywords:** Chromosomes, Human, Pair 16; Chromosome Deletion; Chromosome Duplication; Autism Spectrum Disorder; Schizophrenia Spectrum and Other Psychotic Disorders; Obsessive-Compulsive Disorder; Phenotype.

Address correspondence to [Amandeep.Jutla@nyspi.columbia.edu](mailto:Amandeep.Jutla@nyspi.columbia.edu).

# 1 Introduction

Copy number variation (CNV) is a type of structural genetic variation involving the deletion or duplication of a DNA segment. CNVs are common, often benign, and represent an important mechanism by which humans maintain genetic diversity (Zarrei, MacDonald, Merico, & Scherer, 2015). However, certain specific CNVs are associated with pathology, including neuropsychiatric conditions (Cook Jr & Scherer, 2008). One such CNV is the BP4-BP5 16p11.2 copy number variant (CNV), which involves approximately 600 kilobases and 29 genes (Simons VIP Consortium, 2012). Though rare in the general population, it is overrepresented in those with developmental delay or psychiatric illness. In particular, both the 16p11.2 deletion and duplication are associated with autism spectrum disorder (ASD) (Weiss et al., 2008), and 16p11.2 duplication is associated with schizophrenia (SCZ) (Kushima et al., 2018; Marshall et al., 2017; McCarthy et al., 2009). ASD prevalence is thought to be similar in both groups, with SCZ symptoms more common in duplication than deletion carriers (Niarchou et al., 2019).

The 16p11.2 CNV may provide insight into the complex relationship between symptoms of ASD and symptoms of SCZ, which, while considered distinct psychiatric disorders, converge at the levels of diagnosis, neurodevelopment and epidemiology.

At a diagnostic level, ASD and SCZ share features. In ASD, impaired social-emotional reciprocity is a requirement for the diagnosis (Lord, Elsabbagh, Baird, & Veenstra-VanderWeele, 2018). In SCZ, psychosis is the disorder's hallmark, and can be defined as a gross impairment in the ability to distinguish between inner experience and external reality (Lieberman & First, 2018). "Psychotic symptoms," which include delusional beliefs and perceptual disturbances, reflect this impairment, and are quite distinct from ASD. However, another core SCZ feature, the so-called "negative symptoms," include diminished emotional expression and asociality, and share many features with ASD's social impairment (Hommer & Swedo, 2015).

The nosology of ASD and SCZ in fact has a long and complicated history (J. Rapoport, Chavez, Greenstein, Addington, & Gogtay, 2009; Wolff, 2004).

In 1910, Bleuler originally coined the term "autism" to describe the "withdrawal of the patient to his fantasies" in schizophrenia (Kuhn & Cahn, 2004). Subsequently, Kanner (1943) used the same word to describe the "extreme aloneness from the very beginning of life" in a group of children who, he surmised, had a syndrome that was separate from but related to

31 schizophrenia. For decades thereafter, Kanner's syndrome, variously called "infantile autism"  
32 and "infantile psychosis," was considered one of "the childhood schizophrenias." By the early  
33 1970s, however, mounting evidence suggested that autism and schizophrenia were distinct dis-  
34 orders (Kolvin, 1971; Rutter, 1972 Oct-Dec). In 1980, this distinction was formally codified  
35 (American Psychiatric Association, 1980).

36 It has, however, long been recognized that subtle symptoms, such as delay and abnormality  
37 in language, often precede the emergence of frank psychotic behavior (Courvoisier, Labellarte,  
38 & Riddle, 2001; Millan et al., 2016), and SCZ increasingly has been considered a disorder  
39 of abnormal neurodevelopment (Insel, 2010; Owen, O'Donovan, Thapar, & Craddock, 2011;  
40 J. L. Rapoport, Giedd, & Gogtay, 2012). A recent meta-analysis showed that ASD and SCZ  
41 co-occur more frequently than chance would suggest, with SCZ over three times as common in  
42 individuals with ASD as in controls (Zheng, Zheng, & Zou, 2018).

43 If those with ASD are at elevated risk of SCZ, then recognizing psychotic symptoms in this  
44 population is of particular importance. Unlike ASD, which tends to be stable into adulthood  
45 (Lord et al., 2018), SCZ is characterized by a progressive deterioration in functioning that early  
46 detection and treatment may mitigate (Lieberman & First, 2018).

47 Yet the communication impairment and repetitive speech or behavior associated with ASD  
48 can make assessment and differentiation of delusional beliefs and perceptual disturbances diffi-  
49 cult. Further, repetitive behaviors in ASD are sometimes difficult to distinguish from symptoms  
50 of obsessive compulsive disorder (OCD), which is itself a common co-occurring diagnosis that  
51 shares genetic liability with SCZ and, by extension, ASD (Consortium et al., 2018). Although  
52 OCD symptoms and characteristic repetitive behaviors in ASD are thought to be phenomeno-  
53 logically distinct (Guo et al., 2017; Jiujiias, Kelley, & Hall, 2017), the boundary between them  
54 is not always clear. Obsessive compulsive symptoms may also be important in the context  
55 of recognizing psychosis. Obsessive compulsive symptoms are present in about 30% of people  
56 with SCZ (Swets et al., 2014), and recent evidence has suggested that they may represent a  
57 SCZ risk factor (Barzilay et al., 2018; Meier et al., 2014; Van Dael et al., 2011).

58 We sought to examine predictors of psychotic symptoms in 16p11.2 CNV carriers. By  
59 doing so, we hoped to yield insights relevant to psychosis in the broader ASD population,  
60 improving the understanding of ASD, SCZ, and the relationship these disorders have with

61 each other and with OCD. We hypothesized that: 1) psychotic symptoms are most common  
62 in 16p11.2 duplication carriers followed by 16p11.2 deletion carriers and noncarriers, 2) the  
63 presence of an ASD diagnosis predicts an increased risk of having psychotic symptoms among  
64 CNV carriers, and 3) OCD symptoms will predict psychotic symptoms among both CNV  
65 carriers and noncarriers.

## 66 2 Method

### 67 2.1 Study Sample

68 Probands with the 16p11.2 CNV were identified by routine clinical testing and were recruited  
69 by the Simons Variation in Individuals Project (VIP) (Simons VIP Consortium, 2012), a large  
70 study of specific recurrent genetic variants that contribute to the risk of ASD and other neurode-  
71 velopmental disorders. Probands were recruited from across the United States and Canada.  
72 Recruitment strategies included targeted online advertising via Google and Facebook; links  
73 from patient advocacy websites; direct mailings to clinicians (such as genetic counselors, child  
74 neurologists and developmental pediatricians); and collaborations with cytogenetics laborato-  
75 ries. Once a proband was confirmed to have the CNV, their biological relatives had cascade  
76 genetic testing to identify additional carriers. Carriers were defined as participants with the  
77 canonical 600kb BP4-BP5 16p11.2 duplication or deletion (chromosome 16 position 29,652,999-  
78 30,199,351 in hg19). Individuals with any additional mutations known to be associated with  
79 neurodevelopmental abnormalities (including chromosomal disorders such as fragile X, other  
80 known pathogenic CNVs such as 15q11.2, or monogenic disorders such as tuberous sclerosis)  
81 were excluded. This method produced the complete Simons VIP cohort of 658 participants:  
82 127 16p11.2 duplication (54 initially identified probands, 73 identified through cascade testing),  
83 137 16p11.2 deletion (115 initially identified probands, 22 identified through cascade testing),  
84 and 394 noncarrier relatives. Our study included all cohort members who were evaluated for  
85 ASD and completed an IQ assessment. 546 participants met these criteria: 109 with 16p11.2  
86 duplication (52 initially identified probands, 57 identified through cascade testing), 131 with  
87 16p11.2 deletion (111 initially identified probands, 20 identified through cascade testing), and  
88 306 noncarriers.

89            Within the study sample, we compared several baseline characteristics of 16p11.2 dupli-  
90 cation, 16p11.2 deletion, and noncarrier participants. Mean age and IQ were compared using  
91 analysis of variance (ANOVA), with Tukey’s procedure used for post-hoc pairwise comparisons.  
92 Biological sex, ASD diagnosis, and OCD symptoms were compared using  $\chi^2$ , with Bonferroni-  
93 adjusted  $\chi^2$  for post-hoc comparisons (**Table 1**).

## 94            **2.2 Assessment Measures**

95            Participants traveled to one of three phenotyping sites: Baylor College of Medicine (Houston,  
96 TX), Boston Children’s Hospital (Boston, MA) or University of Washington, Seattle (Seattle,  
97 WA). Travel expenses were paid to limit financial barriers. Participants underwent a standard-  
98 ized assessment performed by trained clinicians that encompassed self-report, parent-report,  
99 interview, and observation measures, with the measures a particular participant received vary-  
100 ing based on age and carrier status (**Table 2**).

101            ASD diagnoses were made based on clinical judgment informed by the results of clinician-  
102 administered and self- or caregiver-report measures. The Autism Diagnostic Observation Scale,  
103 Second Edition (ADOS-2) (Lord et al., 2012), a clinician-administered observational measure,  
104 was administered to all participants except noncarrier parents of carrier children or participants  
105 in whom the measure’s use was not feasible due to limitations of cognition or mobility. An  
106 ADOS-2 assessment involves the administration of one of four modules designed for different  
107 levels of verbal ability and, in the case of Module 4, age. Raw scores are produced for core  
108 domains of social affect (SA) and restricted/repetitive behaviors (RRB), as well as a combined  
109 “total” raw score for overall ASD symptomatology. These raw scores can be converted into  
110 scaled “Calibrated Severity Scores” (CSS) that range from 1 to 10 and represent a standard-  
111 ized quantification of ASD symptom severity (Gotham, Pickles, & Lord, 2009; Hus, Gotham,  
112 & Lord, 2014; Hus & Lord, 2014). The Autism Diagnostic Interview-Revised (ADI-R) (Rutter,  
113 Le Couteur, & Lord, 2003), an interview with the participant’s parent or caregiver, was ad-  
114 ministered to all participants in whom ASD was suspected. Self- or caregiver-report measures  
115 were also used to inform the clinical ASD diagnosis, including the Broad Autism Phenotype  
116 Questionnaire (BAPQ) (Hurley, Losh, Parlier, Reznick, & Piven, 2007), Social Communica-  
117 tion Questionnaire (SCQ) (Rutter, Bailey, & Lord, 2003) and Social Responsiveness Scale

118 (SRS)/Social Responsiveness Scale-Adult Research Version (SRS-ARV) (Constantino, 2005;  
119 Constantino & Todd, 2005).

120 IQ was measured with the Differential Ability Scales, Second Edition (DAS-II) (Elliot,  
121 2007) and Mullen Scales of Early Learning (MSEL) (Shank, 2011) in children and the Wechsler  
122 Abbreviated Scale of Intelligence (WASI) (Wechsler, 1999) in adults. Adaptive skills were  
123 assessed using the Vineland Adaptive Behavior Scales II (Sparrow, Cicchetti, & Balla, 2005).

124 Psychiatric symptoms were assessed using the school-age Child Behavior Checklist (CBCL),  
125 Adult Behavior Checklist (ABCL), Symptom Checklist-90-Revised (SCL-90-R), DISC (Diag-  
126 nostic Interview Schedule for Children), and M-SOPS (Modified Scale of Prodromal Symp-  
127 toms). The CBCL is part of the Achenbach System of Empirically Based Assessment (ASEBA),  
128 and consists of 113 questions about mental health with eight underlying factors (Achenbach  
129 & Rescorla, 2001). It is normed for six to eighteen-year-olds and completed by a parent or  
130 caregiver. The ABCL is an analogous ASEBA scale for adults, normed for ages eighteen to  
131 59 and completed by an adult who knows the participant well (Achenbach & Rescorla, 2003).  
132 The SCL-90-R is a 90-item Likert-type self-report measure of psychiatric symptoms in adults,  
133 with nine underlying factors (Derogatis, 1994). The DISC is a structured diagnostic interview  
134 designed to assess for symptoms of DSM-IV psychiatric disorders in children and adolescents  
135 (Shaffer, Fisher, Lucas, Dulcan, & Schwab-Stone, 2000). The M-SOPS is a nineteen-item  
136 clinician-rated instrument that measures symptoms of psychosis (McGlashan, Miller, Woods,  
137 Hoffman, & Davidson, 2001).

## 138 **2.3 Analytic Approach**

### 139 **2.3.1 Development of a Psychotic Symptom Index**

140 A psychosis-specific measure, the M-SOPS, was only administered to 26 participants. We  
141 therefore derived a composite index of psychotic symptoms by combining M-SOPS responses  
142 with data collected from the CBCL/ABCL, SCL-90-R, and DISC, which all include questions  
143 assessing for psychotic symptoms (**Table S1**). 463 (84.80%) participants received at least one  
144 of these four measures, and 276 (50.55%) received two or more.

145 For each measure, we derived a binary variable indicating a screen-positive or negative for  
146 presence/absence of psychotic symptoms based on predefined criteria. Then, for each pairwise

147 combination of measures, we examined the extent to which positive screens co-occurred and  
148 performed Fisher’s exact test to assess the strength of their relationship.

149 If a subject screened positive by at least two different measures, we considered the composite  
150 index to be positive, reflecting the likely presence of psychotic symptoms. To interrogate the  
151 robustness of this indicator, we created and compared four versions of the composite index.  
152 Version one, which we created first, was the least stringent. Version two used an age cutoff,  
153 version three used a stricter CBCL/ABCL threshold, and version four incorporated both.

154 Positive screens by each measure comprising the index were operationalized as follows:

155 **CBCL/ABCL:** The CBCL/ABCL “Thought Problems” factor includes several psychosis-  
156 related items. As item-level CBCL/ABCL data were not available, for version one of the  
157 index we selected a Thought Problems T-score threshold of  $\geq 60$  to identify scores at least  
158 one standard deviation above the mean, and considered these positive. As the CBCL Thought  
159 Problems T-Score can be elevated in nonpsychotic youth with ASD (Biederman et al., 2010;  
160 Duarte, Bordin, de Oliveira, & Bird, 2003; Hoffmann, Weber, König, Becker, & Kamp-Becker,  
161 2016; Mazefsky, Anderson, Conner, & Minshew, 2011; Ooi, Rescorla, Ang, Woo, & Fung,  
162 2011), versions three and four of the index raised the threshold to  $\geq 70$  (i.e., two rather than  
163 one standard deviations above the mean).

164 **SCL-90-R:** We selected four items reflecting specific psychotic symptoms distinct from  
165 ASD from the SCL-90-R “psychoticism” factor: “the idea that someone else can control your  
166 thoughts,” “hearing voices that other people do not hear,” “other people being aware of your  
167 private thoughts,” and “having thoughts that are not your own.” We considered a response of  
168 at least “a little bit” to any of these items to be a positive screen.

169 **DISC:** For each DSM-IV diagnosis assessed by the DISC interview, data were available  
170 regarding the number of symptoms endorsed but not which were endorsed specifically. We  
171 considered endorsement of at least one schizophrenia symptom within the past year to represent  
172 a positive screen.

173 **M-SOPS:** Five M-SOPS items assess symptoms of psychosis: “unusual thought content  
174 or delusional ideas,” “suspiciousness or persecutory ideas,” “grandiosity,” “perceptual abnor-  
175 malities or hallucinations,” and “disorganized communication.” The presence of at least one  
176 of these symptoms (with the exception of “disorganized communication,” which we did not

177 consider given its non-specificity) represented a positive screen.

178 Versions one and three of the index did not incorporate an age cutoff. However, since true  
179 psychosis in young children is rare, with childhood-onset schizophrenia typically not present-  
180 ing before age seven (Baribeau & Anagnostou, 2013), versions two and four required that a  
181 participant be at least seven years old to be positively identified with psychotic symptoms.

### 182 **2.3.2 Primary Analysis**

183 As index version four was the most stringent, incorporating both the raised CBCL threshold  
184 and the age cutoff, we used it to identify participants likely to have psychotic symptoms. We  
185 then examined predictors of the presence of psychotic symptoms by conducting a series of  
186 logistic regressions. All models used generalized estimating equations (GEEs) to control for  
187 intra-family correlations (Hanley, Negassa, deB Edwardes, & Forrester, 2003).

188 Our predictor variables of interest, which we selected *a priori*, were CNV carrier status, age,  
189 IQ, clinical ASD diagnosis, OCD symptoms (as measured by endorsement of at least one OCD  
190 symptom in the past year during the DISC interview) and biological sex. Prior to conducting  
191 any analyses, we ruled out multicollinearity by inspecting the correlation matrix between scaled  
192 versions of all variables.

193 Our primary analysis included four regression models. The first was estimated for the  
194 entire sample, and included all predictors of interest. The second, third and fourth models  
195 were estimated for subgroups of the sample defined by carrier status (i.e., 16p11.2 deletion  
196 carriers, 16p11.2 duplication carriers, and noncarriers), and each included all predictors of  
197 interest except carrier status. All analyses used unscaled variables for ease of interpretability.

### 198 **2.3.3 Exploratory Regression Analyses**

199 To determine whether ASD severity could predict the presence of psychotic symptoms, we esti-  
200 mated exploratory regression models that substituted the categorical ASD diagnosis predictor  
201 with continuous ADOS CSS values.

202 Total CSS values for participants who received ADOS Modules 1, 2 or 3 were available to  
203 us as part of the Simons VIP dataset. For those who received ADOS Module 4, we derived  
204 total CSS values from item-level data (Hus & Lord, 2014). For all ADOS modules, we derived



205 SA and RRB domain CSS values from item-level data where available (Hus et al., 2014). In  
206 exploratory models for which total CSS was a predictor, we excluded participants who did not  
207 receive the ADOS, yielding a reduced sample (total  $n = 315$ , with 97 duplication carriers, 121  
208 deletion carriers, and 97 noncarriers). In exploratory models for which domain CSS values  
209 were predictors, we excluded participants who lacked item-level data, and whose domain scores  
210 therefore could not be derived. This reduced the sample further (total  $n = 249$ , with 68  
211 duplication carriers, 97 deletion carriers, and 82 noncarriers).

### 212 **2.3.4 Software and Data**

213 We conducted all analyses in R 3.5.1 (R Core Team, 2018), using functions from dplyr 0.7.8  
214 (Wickham, François, Henry, & Müller, 2018), magrittr 1.5 (Wickham & Bache, 2014), and purrr  
215 0.2.5 (Henry & Wickham, 2019), as well as *chisq.post.hoc* from fifer 1.1 (Fife, 2014, March 28/  
216 2019), *rescale* from arm 1.10-1 (Gelman et al., 2018), *geeglm* from geepack 1.2-1 (Hojsgaard,  
217 Halekoh, & Yan, 2016), and *tidy* from broom 0.5.0 (Robinson et al., 2018). Analysis scripts are  
218 available from the authors at <https://github.com/amandeepjutla/2019-16p11-psychosis>. The  
219 Simons VIP 16p11.2 v10.0 dataset used for this study can be requested through the Simons  
220 Foundation Autism Research Initiative (SFARI, RRID:SC\_004261) online portal, SFARI Base,  
221 at <https://base.sfari.org>.

## 222 **3 Results**

### 223 **3.1 Sample Characteristics**

224 The sample represented a broad range of ages ( $M = 23.06$ ,  $SD = 16.95$  years), with signifi-  
225 cant variation in age among 16p11.2 duplication, 16p11.2 deletion, and noncarriers,  $F(2, 543) =$   
226  $71.67$ ,  $p < 2.39 \times 10^{-28}$ , and post-hoc comparisons showed significant differences for duplication-  
227 deletion, noncarrier-duplication, and noncarrier-deletion pairwise comparisons. IQ ( $M =$   
228  $97.69$ ,  $SD = 20.34$ ) also varied significantly among the three groups,  $F(2, 543) = 166.04$ ,  $p <$   
229  $4.38 \times 10^{-57}$ , with post-hoc comparisons showing that duplication and deletion group IQ scores  
230 differed from the noncarrier group, but not from each other.

231 The three groups were not significantly imbalanced in terms of biological sex composition,

232  $\chi^2(1) = 4.57, p = 0.10$ . They differed in terms of ASD diagnosis,  $\chi^2(1) = 50.49, p = 1.08 \times 10^{-11}$   
233 and presence of OCD symptoms,  $\chi^2(1) = 24.29, p = 5.31 \times 10^{-6}$ . Post-hoc comparisons for  
234 ASD and OCD showed that, as with IQ, duplication and deletion carriers differed significantly  
235 from noncarriers but not each other.

### 236 **3.1.1 Participants with Psychotic Symptoms**

237 56 of 282 participants screened positive on the CBCL or ABCL (using the  $\geq 70$  T-Score  
238 cutoff), 50 of 271 on SCL-90-R, 23 of 178 on DISC, and 9 of 26 on M-SOPS (**Table 3**).  
239 We observed some degree of overlap for all possible pairwise combinations of these measures  
240 except SCL-90  $\times$  DISC, which was expected because SCL-90 was given only to adults and  
241 DISC only to children. Tests of relationship strength between pairs (**Table 4**) identified a  
242 statistically significant association between CBCL/ABCL  $\times$  DISC (OR 7.71, 95% CI 2.16 -  
243 42.21,  $p = 2.29 \times 10^{-4}$ ).

244 Using the most stringent version of the composite index (version four), nineteen partici-  
245 pants had likely psychotic symptoms. Of these, nine were female and ten were male. Twelve  
246 had 16p11.2 duplication, four had 16p11.2 deletion, and three were noncarrier family members.  
247 Seven had a clinical ASD diagnosis, and three had OCD symptoms. Two, both duplication  
248 carriers, came from the same family. Most participants who met the “likely psychotic symp-  
249 toms” threshold (eleven of the nineteen) did so by a combination of positive screens on the  
250 CBCL/ABCL and DISC measures. Of the remainder, three screened positive on CBCL/ABCL  
251 and SCL-90-R, three on SCL-90-R and M-SOPS, one on CBCL/ABCL and M-SOPS, and one  
252 on DISC and M-SOPS. No participant screened positive on more than two measures.

253 Their mean age was 18.03 years ( $SD = 10.93$  years), and mean IQ was 81.95 ( $SD = 19.75$ ).

## 254 **3.2 Predictors of Psychotic Symptoms**

255 The parameters of regression models estimated for the primary analysis are presented in **Table**  
256 **5** (for the entire sample) and **Table 6** (for carrier status-defined subgroups).

257 **3.2.1 Hypothesis 1: CNV Carrier Status as Predictor**

258 Hypothesis 1, that psychotic symptoms would be most common in 16p11.2 duplication carriers  
259 followed by 16p11.2 deletion carriers and noncarriers was partially supported by our finding  
260 that, in the model estimated for the entire sample, 16p11.2 duplication carrier status predicted  
261 psychotic symptom presence (OR 7.44, 95% CI 1.77 - 31.18,  $p = 0.006$ ). Neither deletion  
262 carrier status nor noncarrier status was a significant predictor.

263 **3.2.2 Hypothesis 2: ASD Defined by Clinical Diagnosis as Predictor**

264 Hypothesis 2, that ASD diagnosis would predict presence of psychotic symptoms among 16p11.2  
265 CNV carriers, was partially supported by our finding that categorical ASD diagnosis predicted  
266 psychotic symptom presence in the entire sample (OR 4.21, 95% CI 1.31 - 13.56,  $p = 0.02$ ).  
267 An insufficient number of noncarriers had an ASD diagnosis, or co-occurring psychotic symp-  
268 toms, to interpret findings against other subgroups. ASD diagnosis did not reach statistical  
269 significance as a predictor among either CNV carrier-defined subgroup alone.

270 **3.2.3 Hypothesis 3: OCD Symptoms as Predictor**

271 Hypothesis 3, that OCD symptoms would predict the presence of psychotic symptoms among  
272 both carriers and noncarriers, was not significantly supported by our findings.

273 **3.2.4 IQ, Biological Sex and Age as Predictors**

274 IQ and biological sex were not significant predictors of the presence of psychotic symptoms in  
275 the entire sample or any of its subgroups. Age reached statistical significance as a negative  
276 predictor among noncarriers (OR 0.93 for every year increase in age, 95% CI 0.87 - 0.99,  
277  $p = 0.02$ ). This is consistent with evidence that, in the neurotypical population, hallucinations  
278 are more common in children than adults (Maijer, Begemann, Palmen, Leucht, & Sommer,  
279 2018). However, as only three noncarriers had psychotic symptoms, this finding is likely to be  
280 artifactual.

### 281 **3.2.5 Exploration of ASD Severity as Predictor**

282 The parameters of exploratory models that substituted categorical ASD diagnosis with contin-  
283 uous ADOS Calibrated Severity Scores (CSS) are presented in **Table S2** (for total CSS) and  
284 **Table S3** (for domain CSS).

285 Total CSS trended toward significance as a predictor of psychotic symptoms among all  
286 participants who received the ADOS (OR 1.21 for every one point increase in CSS, 95% CI  
287 0.99 - 1.47,  $p = 0.06$ ). We did not find that domain CSS for RRB or SA were significant  
288 predictors.

### 289 **3.2.6 Robustness of Findings**

290 Less stringently-defined versions of the composite psychotic symptom index produced results  
291 similar to the version four results reported above. Duplication status and ASD diagnosis  
292 consistently predicted psychotic symptoms.

293 Version one, which had a CBCL/ABCL T-Score threshold of  $\geq 60$  and no age cutoff, identi-  
294 fied thirty-five participants as having likely psychotic symptoms. Using this group, duplication  
295 status, ASD diagnosis, and OCD symptoms were significant predictors of psychotic symptoms  
296 in the entire sample (duplication: OR 5.13, 95% CI 1.70 - 15.49,  $p < 0.001$ ; ASD diagnosis: OR  
297 2.83, 95% CI 1.08 - 7.40,  $p = 0.03$ ; OCD symptoms: OR 3.32, 95% CI 1.14 - 9.70,  $p = 0.03$ ).  
298 OCD symptoms were also a significant predictor among deletion carriers alone (OR 7.22, 95%  
299 CI 1.30 - 40.09,  $p = 0.02$ ).

300 Version two, which added the requirement that a participant to be at least seven years  
301 old to be identified with psychotic symptoms, reduced the number identified from thirty-five to  
302 thirty. Here, duplication status and ASD diagnosis, but not OCD, were significant predictors of  
303 psychotic symptoms in the entire sample (duplication: OR 6.29, 95% CI 1.86 - 21.25,  $p < 0.01$ ,  
304 ASD: OR 2.80, 95% CI 1.02 - 7.70,  $p = 0.046$ ).

305 Version three, which had no age cutoff but raised the CBCL/ABCL threshold, reduced  
306 participants identified as likely having psychotic symptoms from thirty-five to twenty-one.  
307 Duplication status and ASD continued to predict psychotic symptoms in the entire sample  
308 (duplication: OR 6.64, 95% CI 1.81 - 24.39,  $p < 0.01$ ; ASD: OR 4.13, 95% CI 1.27 - 13.37,  
309  $p = 0.02$ ). OCD was not statistically significant.

310 As the deletion carrier group was younger than the duplication carrier or noncarrier groups,  
311 we conducted an additional sensitivity analysis that constrained the entire sample to partic-  
312 ipants who were at least twelve years old. In this restricted sample (total  $n = 327$ , with 37  
313 deletion carriers, 53 duplication carriers, and 237 non-carriers), we found that duplication sta-  
314 tus remained a significant predictor of psychotic symptoms (OR 39.00, 95% CI 7.34 – 208,  
315  $p = 0.00002$ ). ASD was not a significant predictor, and no participants in this age-constrained  
316 sample had OCD symptoms.

## 317 4 Discussion

318 Our findings indicate an association between 16p11.2 duplication status and psychotic symp-  
319 toms. This aligns with previous studies that reported the 16p11.2 duplication in schizophrenia  
320 genetic samples (Giaroli, Bass, Strydom, Rantell, & McQuillin, 2014; McCarthy et al., 2009;  
321 Rees et al., 2014; Steinberg et al., 2014).

322 We were unable to detect a significant association between 16p11.2 deletion and psychotic  
323 symptoms. This conflicts with reports of schizophrenia diagnosis in association with 16p11.2  
324 deletion carriers (Kushima et al., 2018; Marshall et al., 2017). However, we may have been  
325 underpowered to detect an association. Only four deletion carriers had psychotic symptoms in  
326 our sample, compared with twelve duplication carriers, which is consistent with recent evidence  
327 suggesting that psychotic symptoms may be less common in 16p11.2 deletion than duplication  
328 carriers (Niarchou et al., 2019).

329 Independent of the type of CNV, ASD diagnosis was also a significant predictor of psychosis  
330 risk among 16p11.2 CNV carriers in our primary analysis. Our exploratory analyses of potential  
331 relationships between ASD severity as measured by ADOS Calibrated Severity Scores and  
332 psychosis risk did not yield significant results. However, many participants, most of whom  
333 were noncarriers, did not receive the ADOS and had to be excluded from these models. This  
334 reduction in sample size, along with the exclusion of noncarriers, many of whom may not have  
335 had significant ASD symptoms, could have biased us against detecting an effect.

336 Though we did not find an association between psychotic symptoms and OCD, we did find  
337 that OCD symptoms were more common in 16p11.2 CNV carriers than noncarriers. This sug-

338       gests that 16p11.2 may warrant future exploration in genetic studies of OCD, which currently  
339       are limited (Fernandez, Leckman, & Pittenger, 2018). As of now, 16p11.2 duplication has been  
340       described in, but not specifically associated with, OCD (McGrath et al., 2014).

341       This study has important strengths, primarily pertaining to the unique Simons VIP sample.  
342       The specific focus on a rare genetic variant allowed us to minimize underlying genetic hetero-  
343       geneity in exploring the relationship between ASD and risk of psychotic symptoms. Further,  
344       we tested convergent validity across multiple measures within our psychotic symptom index.  
345       We also were able to verify the stability of our results using alternate versions of the composite  
346       psychotic symptom index with different levels of stringency.

347       This study also has important limitations. Our use of the VIP cohort, despite its advan-  
348       tages, necessarily restricted the conclusions we could draw. Although Simons VIP sought to  
349       mitigate ascertainment bias by conducting cascade testing, a large proportion of the cohort's  
350       deletion carriers in particular were identified probands. Thus, it is unclear to what extent our  
351       findings may generalize to deletion carriers who have not come to clinical attention. As our  
352       study excluded 16p11.2 CNV carriers with additional known mutations associated with neu-  
353       rodevelopmental abnormalities, it is also unclear to what extent our findings might generalize  
354       to such individuals, in whom these additional genetic variants might affect their phenotype.

355       Our focus on a rare CNV limited our sample size, which in turn restricted the statistical  
356       power we could achieve. The ratio between the number of participants with psychotic symptoms  
357       and the number of predictors in our regression models, while in an acceptable range (van  
358       Smeden et al., 2016; Vittinghoff & McCulloch, 2007), could have introduced a potential for  
359       overfitting, particularly in subgroup analyses, though our sensitivity analyses were partially  
360       able to address this.

361       The deletion carriers in our study were, on average, significantly younger than other partic-  
362       ipants. Our inability to detect an association between deletion status and psychotic symptoms  
363       should therefore not be construed as evidence of no association. Psychotic symptoms could  
364       potentially develop in members of this group as they enter adolescence and young adulthood,  
365       and although we still did not detect an association when we restricted the sample to older  
366       participants, the resultant reduction in the deletion group's sample size limited our power.

367       Finally, our psychotic symptom index, though carefully developed, used a combination

368 of self- and parent-report measures with varying levels of specificity for psychosis. As the  
369 CBCL/ABCL Thought Problems factor includes behavioral symptoms other than psychosis, it  
370 is probably the least specific measure we used, followed by DISC, which incorporates DSM-IV  
371 “negative” schizophrenia symptoms that overlap with ASD. However, with the SCL-90-R and  
372 M-SOPS, we were able to use individual items with high specificity, and M-SOPS in particular  
373 was designed specifically for the detection of psychosis. We further increased specificity by  
374 requiring participants to screen positive on two different measures for us to consider them  
375 as having likely psychotic symptoms. Still, it is conceivable that there was heterogeneity  
376 in how participants met the threshold for likely psychotic symptoms and that at least some  
377 participants identified as having symptoms by the index may not have “true” clinical psychosis.  
378 Regarding this potential issue, we consider it reassuring that the majority of participants who  
379 met the threshold (15 of 19) did so by a combination of CBCL/ABCL and some other, more  
380 specific measure, either DISC (11), SCL-90-R (3) or M-SOPS (1). Our finding of a robust  
381 association between psychotic symptoms as identified by our index and 16p11.2 duplication is  
382 also consistent with existing literature.

383 Our work suggests several future directions for research. In subgroup analyses, we observed  
384 that ASD predicted psychotic symptoms at trend-level within the duplication group (OR: 4.46,  
385 95% CI 0.91 – 21.81,  $p = 0.07$ ) but not within the deletion group. This should not be over-  
386 interpreted, but may be worth exploring further, in larger samples, to determine whether it  
387 is robust. If the ASD associated with 16p11.2 duplication but not deletion is in some sense  
388 “psychosis-prone,” it may help in understanding how and why certain individuals with ASD  
389 develop SCZ while others do not.

390 Our “psychotic symptom index” approach should also be further tested for validity. Is it  
391 truly measuring psychotic symptoms, or are ASD-related behaviors leading to false positives?  
392 How might it perform in a population of, for example, SCZ patients without ASD? Accu-  
393 rate measurement will be crucial if the relationship between ASD and psychotic risk is to be  
394 delineated.

395 Longitudinal exploration of symptom evolution in 16p11.2 CNV carriers into adolescence  
396 and adulthood is important and is underway. This may be of particular importance for deletion  
397 carriers. Are psychotic symptoms truly less common in this group, or was this a function of its

398 overall young age?

399 We hope to answer these and other questions. by conducting in-person interviews, cor-  
400 relating clinical metrics with neuroimaging findings, and longitudinally following the Simons  
401 VIP cohort. In doing so, we will more deeply characterize the 16p11.2 deletion and duplica-  
402 tion phenotypes, and help generate hypotheses and insights applicable to psychotic and other  
403 symptoms in a general ASD population.

## 404 **5 Acknowledgments**

405 This project was financially supported by a Whitaker Scholar in Developmental Neuropsychi-  
406 atry Award to AJ funded by Marilyn and James Simons Family Giving.

407 We would like to express our gratitude to all families participating in the Simons Variation  
408 in Individuals Project, and to the Simons Foundation Autism Research Initiative for making  
409 this project possible.

## 410 **6 Disclosures**

411 Dr. Veenstra-VanderWeele has consulted or served on an advisory board for Roche Pharma-  
412 ceuticals, Novartis, and SynapDx, has received research funding from Roche Pharmaceuticals,  
413 Novartis, SynapDx, Seaside Therapeutics, and Forest, and has received an editorial stipend  
414 from Springer and Wiley.

415 Drs. Jutla, Turner, Snyder, and Chung report no biomedical financial interests or potential  
416 conflicts of interest.



| Characteristic        | Total<br>n = 546 |       | Duplication<br>n = 109 |       | Deletion<br>n = 131 |       | Noncarrier<br>n = 306 |       | Main effect<br><br>p (ANOVA) | Post-hoc comparisons<br><br>Pair                                      | p (Tukey)                           |
|-----------------------|------------------|-------|------------------------|-------|---------------------|-------|-----------------------|-------|------------------------------|-----------------------------------------------------------------------|-------------------------------------|
|                       | M                | SD    | M                      | SD    | M                   | SD    | M                     | SD    |                              |                                                                       |                                     |
| Age in years          | 23.06            | 16.95 | 19.84                  | 17.54 | 10.92               | 10.37 | 29.40                 | 15.86 | $2.39 \times 10^{-28***}$    | duplication-deletion<br>noncarrier-deletion<br>noncarrier-duplication | <0.001***<br><0.001***<br><0.001*** |
| IQ                    | 97.69            | 20.34 | 84.59                  | 22.01 | 82.73               | 15.61 | 108.76                | 13.54 | $5.38 \times 10^{-57***}$    | duplication-deletion<br>noncarrier-deletion<br>noncarrier-duplication | 0.65<br><0.001***<br><0.001***      |
|                       | #                | %     | #                      | %     | #                   | %     | #                     | %     | p ( $\chi^2$ )               | Pair                                                                  | p (Bonferroni-adjusted $\chi^2$ )   |
| Female sex            | 292              | 53.48 | 53                     | 48.62 | 63                  | 48.09 | 176                   | 57.52 | 0.10                         | N/A: no significant main effect                                       |                                     |
| ASD diagnosis         | 48               | 8.79  | 17                     | 15.60 | 27                  | 20.61 | 4                     | 1.31  | $1.08 \times 10^{-11***}$    | duplication-deletion<br>noncarrier-deletion<br>noncarrier-duplication | 1<br><0.001***<br><0.001***         |
| OCD symptoms reported | 35               | 6.41  | 11                     | 10.09 | 18                  | 13.74 | 6                     | 1.96  | $5.31 \times 10^{-6***}$     | duplication-deletion<br>noncarrier-deletion<br>noncarrier-duplication | 1<br><0.001***<br>0.002**           |

\*\*\*:  $p < 0.001$   
 \*\*:  $p < 0.01$   
 \*:  $p < 0.05$

Table 1: Sample characteristics

| Domain               | Measure                    | Age              | Type                                                  | Total<br>n = 546 | Duplication<br>n = 109 | Deletion<br>n = 131 | Noncarrier<br>n = 306 |
|----------------------|----------------------------|------------------|-------------------------------------------------------|------------------|------------------------|---------------------|-----------------------|
| ASD                  | ADOS                       | Youth and Adults | Clinician assessment of participant                   | 315              | 97                     | 121                 | 97                    |
|                      | ADI-R                      | Youth and Adults | Interview with parent                                 | 116              | 33                     | 74                  | 9                     |
|                      | BAPQ                       | Adults           | Questionnaire (participant)                           | 252              | 36                     | 13                  | 203                   |
|                      | SCQ                        | Youth            | Questionnaire (parent)                                | 237              | 60                     | 102                 | 75                    |
|                      | SRS                        | Youth            | Questionnaire (parent)                                | 237              | 60                     | 101                 | 76                    |
|                      | SRS-ARV                    | Adults           | Questionnaire (individual who knows participant well) | 253              | 39                     | 12                  | 202                   |
| IQ                   | Mullen                     | Youth            | Clinician assessment of participant                   | 63               | 22                     | 30                  | 11                    |
|                      | DAS-II Early Years (Lower) | Youth            | Clinician assessment of participant                   | 28               | 8                      | 12                  | 8                     |
|                      | DAS-II Early Years (Upper) | Youth            | Clinician assessment of participant                   | 60               | 13                     | 24                  | 23                    |
|                      | DAS-II School Age          | Youth            | Clinician assessment of participant                   | 151              | 35                     | 65                  | 51                    |
|                      | WASI                       | Adults           | Clinician assessment of participant                   | 271              | 42                     | 14                  | 215                   |
| Psychiatric symptoms | CBCL                       | Youth            | Questionnaire (parent)                                | 194              | 47                     | 85                  | 62                    |
|                      | ABCL                       | Adults           | Questionnaire (individual who knows participant well) | 88               | 37                     | 12                  | 39                    |
|                      | SCL-90-R                   | Adults           | Questionnaire (participant)                           | 271              | 43                     | 14                  | 214                   |
|                      | DISC                       | Youth            | Interview with parent                                 | 178              | 42                     | 81                  | 55                    |
|                      | M-SOPS                     | Youth and Adults | Clinician assessment of subject                       | 26               | 15                     | 8                   | 3                     |

Table 2: Phenotypic assessment measures

| Measure   | Total<br>n = 546 |            |            | Duplication<br>n = 109 |            |            | Deletion<br>n = 131 |            |            | Noncarrier<br>n = 306 |            |            |
|-----------|------------------|------------|------------|------------------------|------------|------------|---------------------|------------|------------|-----------------------|------------|------------|
|           | # Received       | # Positive | % Positive | # Received             | # Positive | % Positive | # Received          | # Positive | % Positive | # Received            | # Positive | % Positive |
| CBCL/ABCL | 282              | 56         | 19.86      | 84                     | 27         | 32.14      | 97                  | 21         | 21.65      | 101                   | 8          | 7.92       |
| SCL-90-R  | 271              | 50         | 18.45      | 43                     | 19         | 44.19      | 14                  | 7          | 50         | 24                    | 24         | 11.21      |
| DISC      | 178              | 23         | 12.92      | 42                     | 7          | 16.67      | 81                  | 8          | 9.88       | 55                    | 8          | 14.55      |
| SOPS      | 26               | 9          | 5.06       | 15                     | 5          | 11.9       | 8                   | 3          | 3.7        | 3                     | 1          | 1.82       |

Table 3: Index measures by carrier status

| Pairwise combination |            | Number of participants              |                         | Relationship strength |                     |                     |                  |
|----------------------|------------|-------------------------------------|-------------------------|-----------------------|---------------------|---------------------|------------------|
|                      |            | <i>w/ both measures</i>             | <i>w/ both positive</i> | <i>OR</i>             | <i>95% CI lower</i> | <i>95% CI upper</i> | <i>p</i>         |
| CBCL/ABCL            | × SCL-90-R | 91                                  | 10                      | 2.25                  | 0.74                | 6.77                | 0.12             |
|                      | × DISC     | <b>177</b>                          | <b>20</b>               | <b>7.71</b>           | <b>2.16</b>         | <b>42.21</b>        | <b>0.0002***</b> |
|                      | × M-SOPS   | 25                                  | 5                       | 1.83                  | 0.25                | 15.77               | 0.67             |
| SCL-90-R             | × M-SOPS   | 17                                  | 3                       | 5.96                  | 0.35                | 391.49              | 0.25             |
|                      | × DISC     | N/A: no co-occurrence between items |                         |                       |                     |                     |                  |
| DISC                 | × M-SOPS   | 9                                   | 1                       | 4.58                  | 0.04                | 543.93              | 0.42             |

\*\*\*:  $p < 0.001$

\*\* :  $p < 0.01$

\* :  $p < 0.05$

Table 4: Pairwise combinations between index measures

| Predictor            | <i>B</i>    | <i>SE</i>   | Wald $\chi^2$ | <i>OR</i>   | <i>95% CI lower</i> | <i>95% CI upper</i> | <i>p</i>       |
|----------------------|-------------|-------------|---------------|-------------|---------------------|---------------------|----------------|
| (Intercept)          | -3.98       | 1.45        | 7.57          | 0.02        | 0.00                | 0.32                | 0.01           |
| <b>Duplication</b>   | <b>2.01</b> | <b>0.73</b> | <b>7.52</b>   | <b>7.44</b> | <b>1.77</b>         | <b>31.18</b>        | <b>0.006**</b> |
| Deletion             | 0.51        | 0.89        | 0.32          | 1.66        | 0.29                | 9.55                | 0.57           |
| Age in years         | 0.01        | 0.01        | 0.37          | 1.01        | 0.98                | 1.03                | 0.55           |
| IQ                   | -0.01       | 0.01        | 0.53          | 0.99        | 0.97                | 1.02                | 0.47           |
| <b>ASD diagnosis</b> | <b>1.44</b> | <b>0.6</b>  | <b>5.81</b>   | <b>4.21</b> | <b>1.31</b>         | <b>13.56</b>        | <b>0.02*</b>   |
| OCD symptoms         | 0.73        | 0.74        | 0.97          | 2.08        | 0.49                | 8.91                | 0.33           |
| Biological sex       | 0.01        | 0.47        | 0.00          | 1.01        | 0.40                | 2.53                | 0.98           |

\*\*\*:  $p < 0.001$

\*\* :  $p < 0.01$

\* :  $p < 0.05$

Table 5: Predictors of psychotic symptoms in entire sample

| Predictor                        | <i>B</i>                                                                       | <i>SE</i>   | Wald $\chi^2$ | <i>OR</i>   | 95% <i>CI</i> lower | 95% <i>CI</i> upper | <i>p</i>    |
|----------------------------------|--------------------------------------------------------------------------------|-------------|---------------|-------------|---------------------|---------------------|-------------|
| <i>Duplication carriers only</i> |                                                                                |             |               |             |                     |                     |             |
| (Intercept)                      | -1.79                                                                          | 1.52        | 1.39          | 0.17        | 0.01                | 3.26                | 0.24        |
| Age in years                     | 0.02                                                                           | 0.02        | 1.29          | 1.02        | 0.99                | 1.05                | 0.26        |
| IQ                               | -0.01                                                                          | 0.02        | 0.41          | 0.99        | 0.96                | 1.02                | 0.52        |
| ASD diagnosis                    | 1.49                                                                           | 0.81        | 3.4           | 4.46        | 0.91                | 21.81               | 0.07        |
| OCD symptoms                     | N/A : no duplication carriers positive for psychotic symptoms had OCD symptoms |             |               |             |                     |                     |             |
| Biological sex                   | -0.29                                                                          | 0.68        | 0.18          | 0.75        | 0.2                 | 2.85                | 0.67        |
| <i>Deletion carriers only</i>    |                                                                                |             |               |             |                     |                     |             |
| (Intercept)                      | -6.52                                                                          | 3.62        | 3.25          | 0.00        | 0.00                | 1.76                | 0.07        |
| Age in years                     | 0.00                                                                           | 0.03        | 0.02          | 1.00        | 0.95                | 1.06                | 0.90        |
| IQ                               | 0.02                                                                           | 0.03        | 0.46          | 1.02        | 0.96                | 1.08                | 0.50        |
| ASD diagnosis                    | 1.41                                                                           | 1.17        | 1.45          | 4.10        | 0.41                | 40.63               | 0.23        |
| OCD symptoms                     | 1.94                                                                           | 1.17        | 2.76          | 6.99        | 0.70                | 69.31               | 0.10        |
| Biological sex                   | 0.47                                                                           | 1.24        | 0.14          | 1.60        | 0.14                | 18.05               | 0.70        |
| <i>Noncarriers only</i>          |                                                                                |             |               |             |                     |                     |             |
| (Intercept)                      | -0.71                                                                          | 2.91        | 0.06          | 0.49        | 0                   | 146.86              | 0.81        |
| <b>Age in years</b>              | <b>-0.08</b>                                                                   | <b>0.03</b> | <b>5.58</b>   | <b>0.93</b> | <b>0.87</b>         | <b>0.99</b>         | <b>0.02</b> |
| IQ                               | -0.03                                                                          | 0.03        | 0.85          | 0.97        | 0.91                | 1.03                | 0.36        |
| ASD diagnosis                    | N/A: no noncarriers positive for psychotic symptoms had ASD                    |             |               |             |                     |                     |             |
| OCD symptoms                     | 2.09                                                                           | 1.46        | 2.05          | 8.12        | 0.46                | 142.96              | 0.15        |
| Biological sex                   | 0.56                                                                           | 1.69        | 0.11          | 1.75        | 0.06                | 47.71               | 0.74        |

\*\*\*:  $p < 0.001$

\*\* :  $p < 0.01$

\* :  $p < 0.05$

Table 6: Predictors of psychotic symptoms within carrier status-defined subsets

| Measure   | Item(s)                                                                                                                                                                                                                                                                                                                                                                                                                                                                                                                                                                                                                                                                                                                                                                |
|-----------|------------------------------------------------------------------------------------------------------------------------------------------------------------------------------------------------------------------------------------------------------------------------------------------------------------------------------------------------------------------------------------------------------------------------------------------------------------------------------------------------------------------------------------------------------------------------------------------------------------------------------------------------------------------------------------------------------------------------------------------------------------------------|
| CBCL/ABCL | <p><i>Thought Problems T Score <math>\geq 60</math> based on the following:</i></p> <p>Hears sound or voices that aren't there<br/> Sees things that aren't there<br/> Strange behavior<br/> Strange ideas<br/> Can't get his/her mind off certain thoughts; obsessions<br/> Repeats certain acts over and over; compulsions<br/> Picks nose, skin, or other parts of body (CBCL) / Picks skin or other parts of body (ABCL)<br/> Plays with own sex parts too much<br/> Plays with own sex parts in public<br/> Stores up too many things he/she doesn't need<br/> Deliberately harms self or attempts suicide<br/> Nervous movements or twitching<br/> Trouble sleeping<br/> Talks or walks in sleep<br/> Sleeps less than most kids (CBCL) / most people (ABCL)</p> |
| SCL-90-R  | <p><i>Response of at least "a little bit" to "for the past week, how much were you bothered by . . . ":</i></p> <p>The idea that someone else can control your thoughts<br/> Hearing voices that other people do not hear<br/> Other people being aware of your private thoughts<br/> Having thoughts that are not your own</p>                                                                                                                                                                                                                                                                                                                                                                                                                                        |
| DISC      | <p><i>At least one DSM-IV schizophrenia symptom within the past year:</i></p> <p>Delusions<br/> Hallucinations<br/> Disorganized speech<br/> Grossly disorganized or catatonic behavior<br/> Negative symptoms</p>                                                                                                                                                                                                                                                                                                                                                                                                                                                                                                                                                     |
| M-SOPS    | <p><i>One or more of the following symptoms is present:</i></p> <p>Unusual thought content/delusional ideas<br/> Suspiciousness/persecutory ideas<br/> Grandiosity<br/> Perceptual abnormalities/hallucinations</p>                                                                                                                                                                                                                                                                                                                                                                                                                                                                                                                                                    |

Table S1: Psychotic symptom index measures

| Predictor      | <i>B</i> | SE   | Wald $\chi^2$ | OR   | 95% CI lower | 95% CI upper | <i>p</i> |
|----------------|----------|------|---------------|------|--------------|--------------|----------|
| (Intercept)    | -2.3     | 1.59 | 2.08          | 0.10 | 0.00         | 2.29         | 0.15     |
| Duplication    | 0.60     | 0.66 | 0.82          | 1.82 | 0.50         | 6.70         | 0.37     |
| Deletion       | -0.86    | 0.85 | 1.02          | 0.42 | 0.08         | 2.25         | 0.31     |
| Age in years   | 0.02     | 0.01 | 2.25          | 1.02 | 0.99         | 1.05         | 0.13     |
| IQ             | -0.02    | 0.01 | 1.68          | 0.98 | 0.96         | 1.01         | 0.19     |
| Total CSS      | 0.19     | 0.10 | 3.56          | 1.21 | 0.99         | 1.47         | 0.06     |
| OCD symptoms   | -0.05    | 0.87 | 0.00          | 0.95 | 0.17         | 5.22         | 0.95     |
| Biological sex | -0.13    | 0.52 | 0.06          | 0.88 | 0.32         | 2.42         | 0.80     |

\*\*\*:  $p < 0.001$

\*\* :  $p < 0.01$

\* :  $p < 0.05$

Table S2: ADOS Total Calibrated Severity Score as predictor of psychotic symptoms

| Predictor      | <i>B</i> | SE   | Wald $\chi^2$ | OR   | 95% CI lower | 95% CI upper | <i>p</i> |
|----------------|----------|------|---------------|------|--------------|--------------|----------|
| (Intercept)    | -1.79    | 1.87 | 0.92          | 0.17 | 0.00         | 6.47         | 0.34     |
| Duplication    | 0.81     | 0.88 | 0.84          | 2.24 | 0.40         | 12.53        | 0.36     |
| Deletion       | -0.27    | 0.98 | 0.07          | 0.77 | 0.11         | 5.23         | 0.79     |
| Age            | 0.03     | 0.02 | 3.47          | 1.03 | 1.00         | 1.06         | 0.06     |
| IQ             | -0.03    | 0.01 | 5.64          | 0.97 | 0.94         | 0.99         | 0.02     |
| RRB CSS        | 0.10     | 0.14 | 0.52          | 1.11 | 0.84         | 1.47         | 0.47     |
| SA CSS         | 0.13     | 0.13 | 1.08          | 1.14 | 0.89         | 1.46         | 0.30     |
| OCD symptoms   | 0.33     | 0.79 | 0.17          | 1.39 | 0.30         | 6.54         | 0.68     |
| Biological sex | 0.65     | 0.62 | 1.10          | 1.91 | 0.57         | 6.42         | 0.29     |

\*\*\*:  $p < 0.001$

\*\* :  $p < 0.01$

\* :  $p < 0.05$

Table S3: ADOS domain calibrated severity scores as predictors of psychosis

## References

- Achenbach, T. M., & Rescorla, L. (2001). *Manual for the ASEBA School-Age Forms & Profiles*. Burlington, VT: University of Vermont, Research Center for Children, Youth, & Families.
- Achenbach, T. M., & Rescorla, L. (2003). *Manual for the ASEBA Adult Forms & Profiles*. Burlington, VT: University of Vermont, Research Center for Children, Youth, & Families.
- American Psychiatric Association. (1980). *Diagnostic and Statistical Manual of Mental Disorders* (3rd). American Psychiatric Association.
- Baribeau, D. A., & Anagnostou, E. (2013). A comparison of neuroimaging findings in childhood onset schizophrenia and autism spectrum disorder: A review of the literature. *Frontiers in Psychiatry*, 4. doi:10.3389/fpsyt.2013.00175
- Barzilay, R., Patrick, A., Calkins, M. E., Moore, T. M., Wolf, D. H., Benton, T. D., ... Gur, R. E. (2018, November 23). Obsessive compulsive symptomatology in community youth: Typical development or a red flag for psychopathology? *Journal of the American Academy of Child & Adolescent Psychiatry*, 0(0). doi:10.1016/j.jaac.2018.06.038
- Biederman, J., Petty, C. R., Fried, R., Wozniak, J., Micco, J. A., Henin, A., ... Faraone, S. V. (2010, June). Child Behavior Checklist clinical scales discriminate referred youth with autism spectrum disorder: A preliminary study. *Journal of Developmental & Behavioral Pediatrics*, 1. doi:10.1097/DBP.0b013e3181e56ddd
- Consortium, T. B., Anttila, V., Bulik-Sullivan, B., Finucane, H. K., Walters, R. K., Bras, J., ... Neale, B. M. (2018, June 22). Analysis of shared heritability in common disorders of the brain. *Science*, 360(6395), eaap8757. doi:10.1126/science.aap8757. pmid: 29930110
- Constantino, J. N. (2005). *Social Responsiveness Scale*. Western Psychological Services.
- Constantino, J. N., & Todd, R. D. (2005, March 15). Intergenerational transmission of subthreshold autistic traits in the general population. *Biological Psychiatry*, 57(6), 655–660. doi:10.1016/j.biopsych.2004.12.014
- Cook Jr, E. H., & Scherer, S. W. (2008, October 15). Copy-number variations associated with neuropsychiatric conditions. *Nature*. doi:10.1038/nature07458
- Courvoisie, H., Labellarte, M. J., & Riddle, M. A. (2001, June). Psychosis in children: Diagnosis and treatment. *Dialogues in Clinical Neuroscience*, 3(2), 79–92. pmid: 22033588
- Derogatis, L. R. (1994). *SCL-90-R: Symptom Checklist-90-R: Administration, scoring, and procedures manual*. Pearson.
- Duarte, C. S., Bordin, I. A. S., de Oliveira, A., & Bird, H. (2003, December 1). The CBCL and the identification of children with autism and related conditions in Brazil: Pilot findings. *Journal of Autism and Developmental Disorders*, 33(6), 703–707. doi:10.1023/B:JADD.0000006005.31818.1c
- Elliot, C. D. (2007). *Differential Ability Scales-II*. San Antonio, TX: Psychological Corporation.
- Fernandez, T. V., Leckman, J. F., & Pittenger, C. (2018, January 1). Genetic susceptibility in obsessive-compulsive disorder. In D. H. Geschwind, H. L. Paulson, &

- C. Klein (Eds.), *Handbook of Clinical Neurology* (Vol. 148, pp. 767–781). Neurogenetics, Part II. doi:10.1016/B978-0-444-64076-5.00049-1
- Fife, D. (2019, January 17). Fifer: A collection of R functions for data manipulation, data analysis, and plotting. Retrieved February 2, 2019, from <https://github.com/dustinfife/fifer>
- Gelman, A., Su, Y.-S., Yajima, M., Hill, J., Pittau, M. G., Kerman, J., . . . Dorie, V. (2018, April 13). Arm: Data analysis using regression and multilevel/hierarchical models. Retrieved April 9, 2019, from <https://CRAN.R-project.org/package=arm>
- Giaroli, G., Bass, N., Strydom, A., Rantell, K., & McQuillin, A. (2014, November 1). Does rare matter? Copy number variants at 16p11.2 and the risk of psychosis: A systematic review of literature and meta-analysis. *Schizophrenia Research*, *159*(2), 340–346. doi:10.1016/j.schres.2014.09.025
- Gotham, K., Pickles, A., & Lord, C. (2009, May 1). Standardizing ADOS scores for a measure of severity in autism spectrum disorders. *Journal of Autism and Developmental Disorders*, *39*(5), 693–705. doi:10.1007/s10803-008-0674-3
- Guo, W., Samuels, J. F., Wang, Y., Cao, H., Ritter, M., Nestadt, P. S., . . . Shugart, Y. Y. (2017, July 1). Polygenic risk score and heritability estimates reveals a genetic relationship between ASD and OCD. *European Neuropsychopharmacology*, *27*(7), 657–666. doi:10.1016/j.euroneuro.2017.03.011
- Hanley, J. A., Negassa, A., deB Edwardes, M. D., & Forrester, J. E. (2003, February 15). Statistical analysis of correlated data using generalized estimating equations: An orientation. *American Journal of Epidemiology*, *157*(4), 364–375. doi:10.1093/aje/kwf215
- Henry, L., & Wickham, H. (2019, March 15). Purrr: Functional programming tools. Retrieved April 9, 2019, from <https://CRAN.R-project.org/package=purrr>
- Hoffmann, W., Weber, L., König, U., Becker, K., & Kamp-Becker, I. (2016, July 1). The role of the CBCL in the assessment of autism spectrum disorders: An evaluation of symptom profiles and screening characteristics. *Research in Autism Spectrum Disorders*, *27*, 44–53. doi:10.1016/j.rasd.2016.04.002
- Hojsgaard, S., Halekoh, U., & Yan, J. (2016, September 24). Geepack: Generalized estimating equation package. Retrieved December 19, 2018, from <https://CRAN.R-project.org/package=geepack>
- Hommer, R. E., & Swedo, S. E. (2015, March 1). Schizophrenia and autism—related disorders. *Schizophrenia Bulletin*, *41*(2), 313–314. doi:10.1093/schbul/sbu188
- Hurley, R. S. E., Losh, M., Parlier, M., Reznick, J. S., & Piven, J. (2007). The Broad Autism Phenotype Questionnaire. *J Autism Dev Disord*, *37*(9), 1679–90.
- Hus, V., Gotham, K., & Lord, C. (2014, October). Standardizing ADOS Domain Scores: Separating severity of social affect and restricted and repetitive behaviors. *Journal of autism and developmental disorders*, *44*(10), 2400–2412. doi:10.1007/s10803-012-1719-1. pmid: 23143131
- Hus, V., & Lord, C. (2014, August). The Autism Diagnostic Observation Schedule, Module 4: Revised algorithm and standardized severity scores. *Journal of autism and developmental disorders*, *44*(8), 1996–2012. doi:10.1007/s10803-014-2080-3. pmid: 24590409
- Insel, T. R. (2010, November 10). Rethinking schizophrenia. *Nature*, *468*(7321), nature09552. doi:10.1038/nature09552

- Jiuqias, M., Kelley, E., & Hall, L. (2017, December 1). Restricted, repetitive behaviors in autism spectrum disorder and obsessive-compulsive disorder: A comparative review. *Child Psychiatry & Human Development*, *48*(6), 944–959. doi:10.1007/s10578-017-0717-0
- Kanner, L. (1943). Autistic disturbances of affective contact. *Nervous Child*, *2*, 217–50.
- Kolvin, I. (1971, April). Studies in the childhood psychoses I: Diagnostic criteria and classification. *The British Journal of Psychiatry*, *118*(545), 381–384. doi:10.1192/bjp.118.545.381
- Kuhn, R., & Cahn, C. H. (2004, September 1). Eugen Bleuler’s concepts of psychopathology. *History of Psychiatry*, *15*(3), 361–366. doi:10.1177/0957154X04044603
- Kushima, I., Aleksic, B., Nakatochi, M., Shimamura, T., Okada, T., Uno, Y., . . . Ozaki, N. (2018, September 11). Comparative analyses of copy-number variation in autism spectrum disorder and schizophrenia reveal etiological overlap and biological insights. *Cell Reports*, *24*(11), 2838–2856. WOS:000444267600005. doi:10.1016/j.celrep.2018.08.022
- Lieberman, J. A., & First, M. B. (2018, July 19). Psychotic disorders. *New England Journal of Medicine*, *379*(3), 270–280. doi:10.1056/NEJMra1801490
- Lord, C., Elsabbagh, M., Baird, G., & Veenstra-VanderWeele, J. (2018, August 2). Autism spectrum disorder. *The Lancet*. doi:10.1016/S0140-6736(18)31129-2
- Lord, C., Rutter, M., DiLavore, P. C., Risi, S., Gotham, K., & Bishop, S. L. (2012). *Autism Diagnostic Observation Schedule Modules 1-4* (2nd). Torrance, CA: Western Psychological Services.
- Maijer, K., Begemann, M. J. H., Palmen, S. J. M. C., Leucht, S., & Sommer, I. E. C. (2018, April). Auditory hallucinations across the lifespan: A systematic review and meta-analysis. *Psychological Medicine*, *48*(6), 879–888. doi:10.1017/S0033291717002367
- Marshall, C. R., Howrigan, D. P., Merico, D., Thiruvahindrapuram, B., Wu, W., Greer, D. S., . . . CNV and Schizophrenia Working Groups of the Psychiatric Genomics Consortium. (2017, January). Contribution of copy number variants to schizophrenia from a genome-wide study of 41,321 subjects. *Nature Genetics*, *49*(1), 27–35. doi:10.1038/ng.3725
- Mazefsky, C. A., Anderson, R., Conner, C. M., & Minshew, N. (2011, March). Child Behavior Checklist scores for school-aged children with autism: Preliminary evidence of patterns suggesting the need for referral. *Journal of psychopathology and behavioral assessment*, *33*(1), 31–37. doi:10.1007/s10862-010-9198-1. pmid: 22661827
- McCarthy, S. E., Makarov, V., Kirov, G., Addington, A. M., McClellan, J., Yoon, S., . . . Sebat, J. (2009). Microduplications of 16p11.2 are associated with schizophrenia. *Nature Genetics*, *41*(11), 1223–7. doi:10.1038/ng.474
- McGlashan, T. H., Miller, T. J., Woods, S. W., Hoffman, R. E., & Davidson, L. (2001). Instrument for the Assessment of Prodromal Symptoms and States. In T. Miller, S. A. Mednick, T. H. McGlashan, J. Libiger, & J. O. Johannessen (Eds.), *Early Intervention in Psychotic Disorders* (pp. 135–149). NATO Science Series. doi:10.1007/978-94-010-0892-1\_7
- McGrath, L. M., Yu, D., Marshall, C., Davis, L. K., Thiruvahindrapuram, B., Li, B., . . . Scharf, J. M. (2014, August 1). Copy number variation in obsessive-compulsive disorder and tourette syndrome: A cross-disorder study. *Journal of the American*



- Academy of Child & Adolescent Psychiatry*, 53(8), 910–919. doi:10.1016/j.jaac.2014.04.022
- Meier, S. M., Petersen, L., Pedersen, M. G., Arendt, M. C. B., Nielsen, P. R., Mattheisen, M., ... Mortensen, P. B. (2014, November 1). Obsessive-compulsive disorder as a risk factor for schizophrenia: A nationwide study. *JAMA Psychiatry*, 71(11), 1215–1221. doi:10.1001/jamapsychiatry.2014.1011
- Millan, M. J., Andrieux, A., Bartzokis, G., Cadenhead, K., Dazzan, P., Fusar-Poli, P., ... Weinberger, D. (2016, July). Altering the course of schizophrenia: Progress and perspectives. *Nat Rev Drug Discov*, 15, 485–515. doi:10.1038/nrd.2016.28
- Niarchou, M., Chawner, S. J. R. A., Doherty, J. L., Maillard, A. M., Jacquemont, S., Chung, W. K., ... van den Bree, M. B. M. (2019, January 16). Psychiatric disorders in children with 16p11.2 deletion and duplication. *Translational Psychiatry*, 9(1), 8. doi:10.1038/s41398-018-0339-8
- Ooi, Y. P., Rescorla, L., Ang, R. P., Woo, B., & Fung, D. S. S. (2011, September 1). Identification of autism spectrum disorders using the Child Behavior Checklist in Singapore. *Journal of Autism and Developmental Disorders*, 41(9), 1147–1156. doi:10.1007/s10803-010-1015-x
- Owen, M. J., O'Donovan, M. C., Thapar, A., & Craddock, N. (2011, March). Neurodevelopmental hypothesis of schizophrenia. *The British Journal of Psychiatry*, 198(3), 173–175. doi:10.1192/bjp.bp.110.084384
- R Core Team. (2018). R: A language and environment for statistical computing. Retrieved from <https://www.r-project.org>
- Rapoport, J. L., Giedd, J. N., & Gogtay, N. (2012, December). Neurodevelopmental model of schizophrenia: Update 2012. *Molecular Psychiatry*, 17(12), 1228–1238. doi:10.1038/mp.2012.23
- Rapoport, J., Chavez, A., Greenstein, D., Addington, A., & Gogtay, N. (2009, January 1). Autism spectrum disorders and childhood-onset schizophrenia: Clinical and biological contributions to a relation revisited. *Journal of the American Academy of Child & Adolescent Psychiatry*, 48(1), 10–18. doi:10.1097/CHI.0b013e31818b1c63. pmid: 19218893
- Rees, E., Walters, J. T. R., Georgieva, L., Isles, A. R., Chambert, K. D., Richards, A. L., ... Kirov, G. (2014, February). Analysis of copy number variations at 15 schizophrenia-associated loci. *The British Journal of Psychiatry*, 204(2), 108–114. doi:10.1192/bjp.bp.113.131052. pmid: 24311552
- Robinson, D., Hayes, A., Gomez, M., Demeshev, B., Menne, D., Nutter, B., ... Werner, K. D. (2018, December 5). broom: Convert statistical analysis objects into tidy tibbles. Retrieved December 19, 2018, from <https://CRAN.R-project.org/package=broom>
- Rutter, M. (1972 Oct-Dec). Childhood schizophrenia reconsidered. *Journal of Autism and Childhood Schizophrenia*, 2(4), 315–337. pmid: 4581613
- Rutter, M., Bailey, A., & Lord, C. (2003). *Social Communication Questionnaire*. Western Psychological Services.
- Rutter, M., Le Couteur, A., & Lord, C. (2003). *Autism Diagnostic Interview-Revised*. Torrance, CA: Western Psychological Services.
- Shaffer, D., Fisher, P., Lucas, C. P., Dulcan, M. K., & Schwab-Stone, M. E. (2000, January). NIMH Diagnostic Interview Schedule for Children Version IV (NIMH

- DISC-IV): Description, differences from previous versions, and reliability of some common diagnoses. *Journal of the American Academy of Child & Adolescent Psychiatry*, 39(1), 28–38. doi:10.1097/00004583-200001000-00014
- Shank, L. (2011). Mullen Scales of Early Learning. In *Encyclopedia of Clinical Neuropsychology* (pp. 1669–1671). doi:10.1007/978-0-387-79948-3\_1570
- Simons VIP Consortium. (2012, March 22). Simons Variation in Individuals Project (Simons VIP): A genetics-first approach to studying autism spectrum and related neurodevelopmental disorders. *Neuron*, 73(6), 1063–1067. doi:10.1016/j.neuron.2012.02.014. pmid: 22445335
- Sparrow, S. S., Cicchetti, D. V., & Balla, D. A. (2005). *Vineland Adaptive Behavior Scales Vineland-II: Survey Forms Manual*. Pearson.
- Steinberg, S., de Jong, S., Mattheisen, M., Costas, J., Demontis, D., Jamain, S., ... Stefansson, K. (2014, January). Common variant at 16p11.2 conferring risk of psychosis. *Molecular Psychiatry*, 19, 108–114. doi:10.1038/mp.2012.157
- Swets, M., Dekker, J., van Emmerik-van Oortmerssen, K., Smid, G. E., Smit, F., de Haan, L., & Schoevers, R. A. (2014, February 1). The obsessive compulsive spectrum in schizophrenia, a meta-analysis and meta-regression exploring prevalence rates. *Schizophrenia Research*, 152(2), 458–468. doi:10.1016/j.schres.2013.10.033
- Van Dael, F., van Os, J., de Graaf, R., ten Have, M., Krabbendam, L., & Myin-Germeys, I. (2011, February). Can obsessions drive you mad? Longitudinal evidence that obsessive-compulsive symptoms worsen the outcome of early psychotic experiences. *Acta Psychiatrica Scandinavica*, 123(2), 136–146. doi:10.1111/j.1600-0447.2010.01609.x
- van Smeden, M., de Groot, J. A. H., Moons, K. G. M., Collins, G. S., Altman, D. G., Eijkemans, M. J. C., & Reitsma, J. B. (2016, November 24). No rationale for 1 variable per 10 events criterion for binary logistic regression analysis. *BMC Medical Research Methodology*, 16. doi:10.1186/s12874-016-0267-3. pmid: 27881078
- Vittinghoff, E., & McCulloch, C. E. (2007, March 15). Relaxing the rule of ten events per variable in logistic and Cox regression. *American Journal of Epidemiology*, 165(6), 710–718. doi:10.1093/aje/kwk052
- Wechsler, D. (1999). *Wechsler Abbreviated Scale of Intelligence*. San Antonio, TX: Psychological Corporation.
- Weiss, L. A., Shen, Y., Korn, J. M., Arking, D. E., Miller, D. T., Fossdal, R., ... Daly, M. J. (2008, February 14). Association between microdeletion and microduplication at 16p11.2 and autism. *New England Journal of Medicine*, 358(7), 667–675. doi:10.1056/NEJMoa075974. pmid: 18184952
- Wickham, H., & Bache, S. M. (2014, November 22). Magrittr: A forward-pipe operator for R. Retrieved April 9, 2019, from <https://CRAN.R-project.org/package=magrittr>
- Wickham, H., François, R., Henry, L., & Müller, K. (2018, November 10). Dplyr: A grammar of data manipulation. Retrieved December 19, 2018, from <https://CRAN.R-project.org/package=dplyr>
- Wolff, S. (2004, August). The history of autism. *Eur Child Adolesc Psychiatry*, 13, 201–8. doi:10.1007/s00787-004-0363-5

- Zarrei, M., MacDonald, J. R., Merico, D., & Scherer, S. W. (2015, March). A copy number variation map of the human genome. *Nature Reviews Genetics*, *16*(3), 172–183. doi:10.1038/nrg3871
- Zheng, Z., Zheng, P., & Zou, X. (2018, August 1). Association between schizophrenia and autism spectrum disorder: A systematic review and meta-analysis. *Autism Research*, *11*(8), 1110–1119. doi:10.1002/aur.1977
